# Supplementary material
Source: PubMed Central journal article supplement (PMC5635970)

# Supplementary Figure-3, Heisenberg

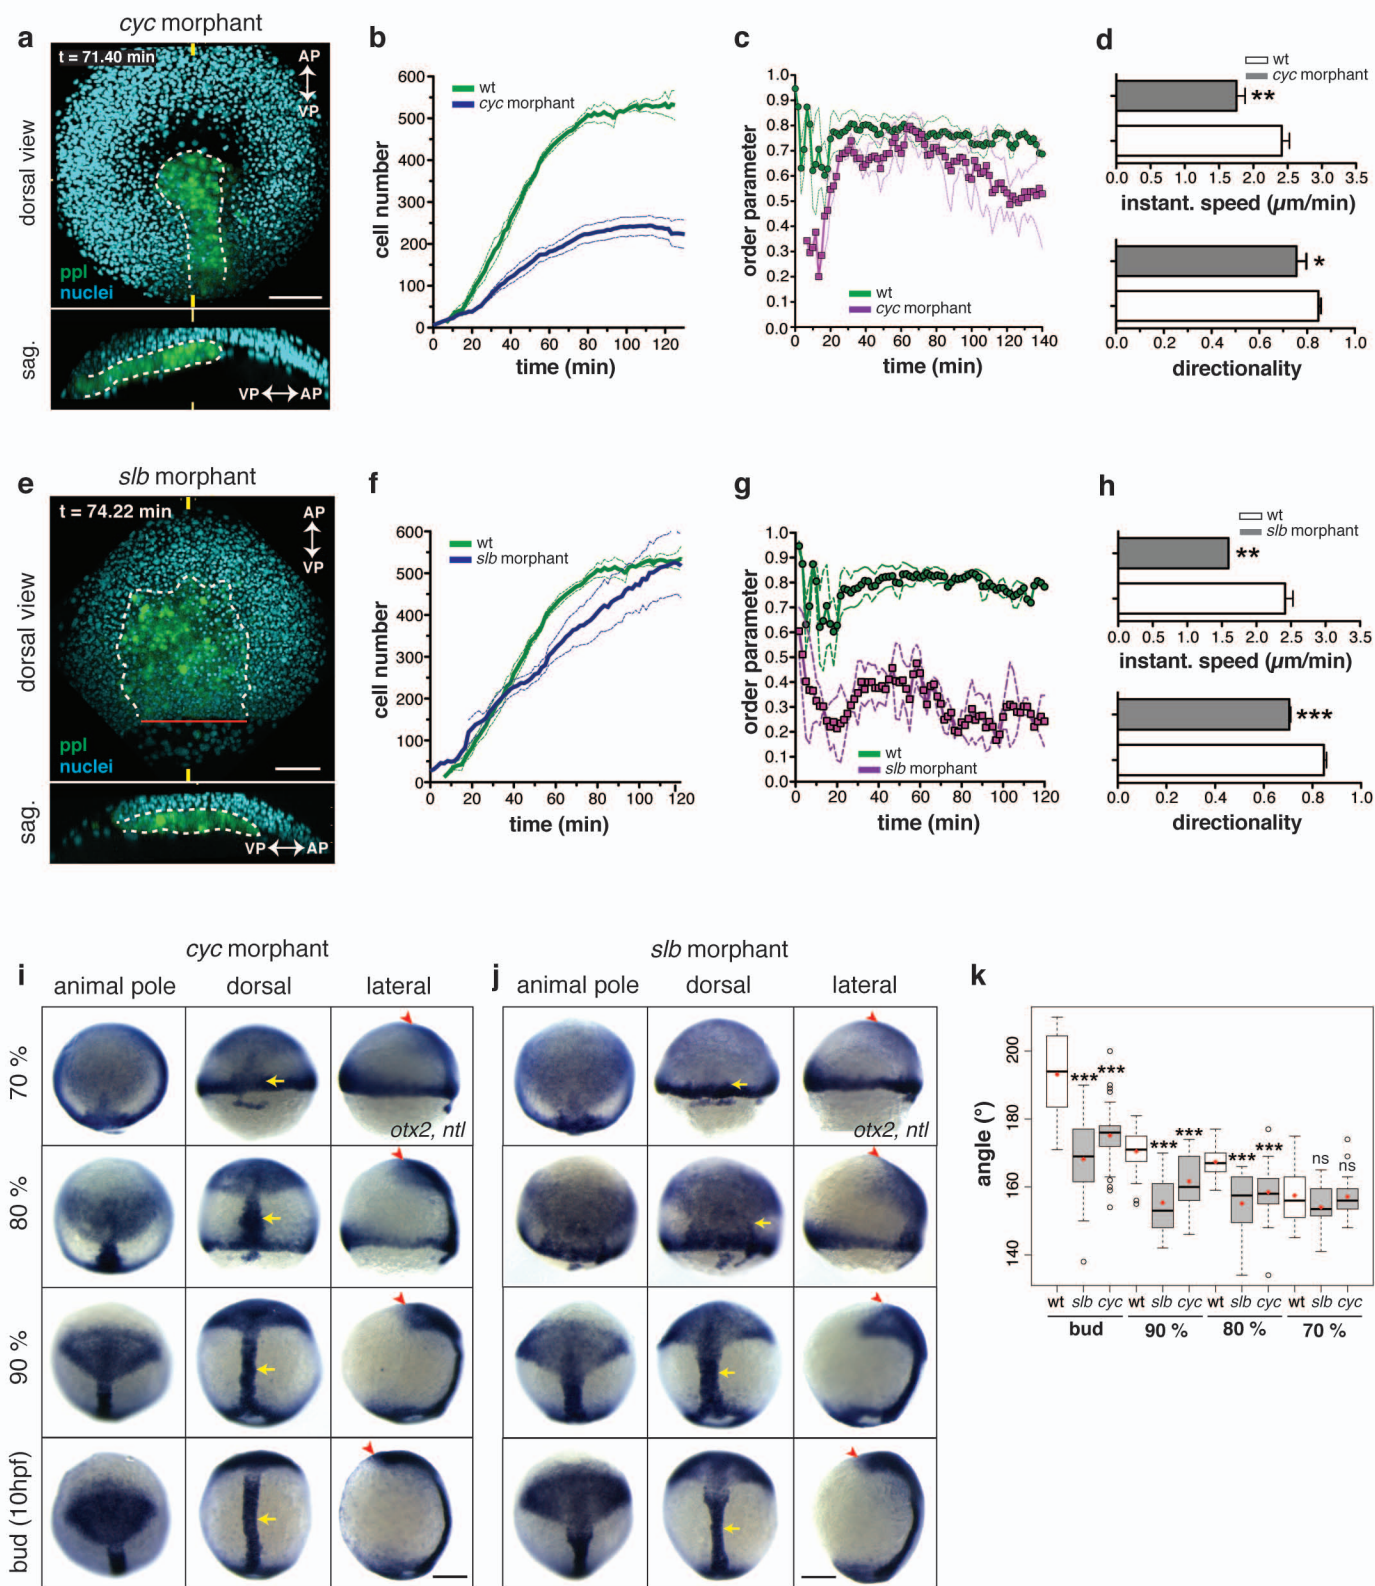

Supplement: NIHMS71588-supplement-Supplemental_Figure_3.pdf [file NIHMS71588-supplement-Supplemental_Figure_3.pdf]

# Supplementary Figure-4, Heisenberg

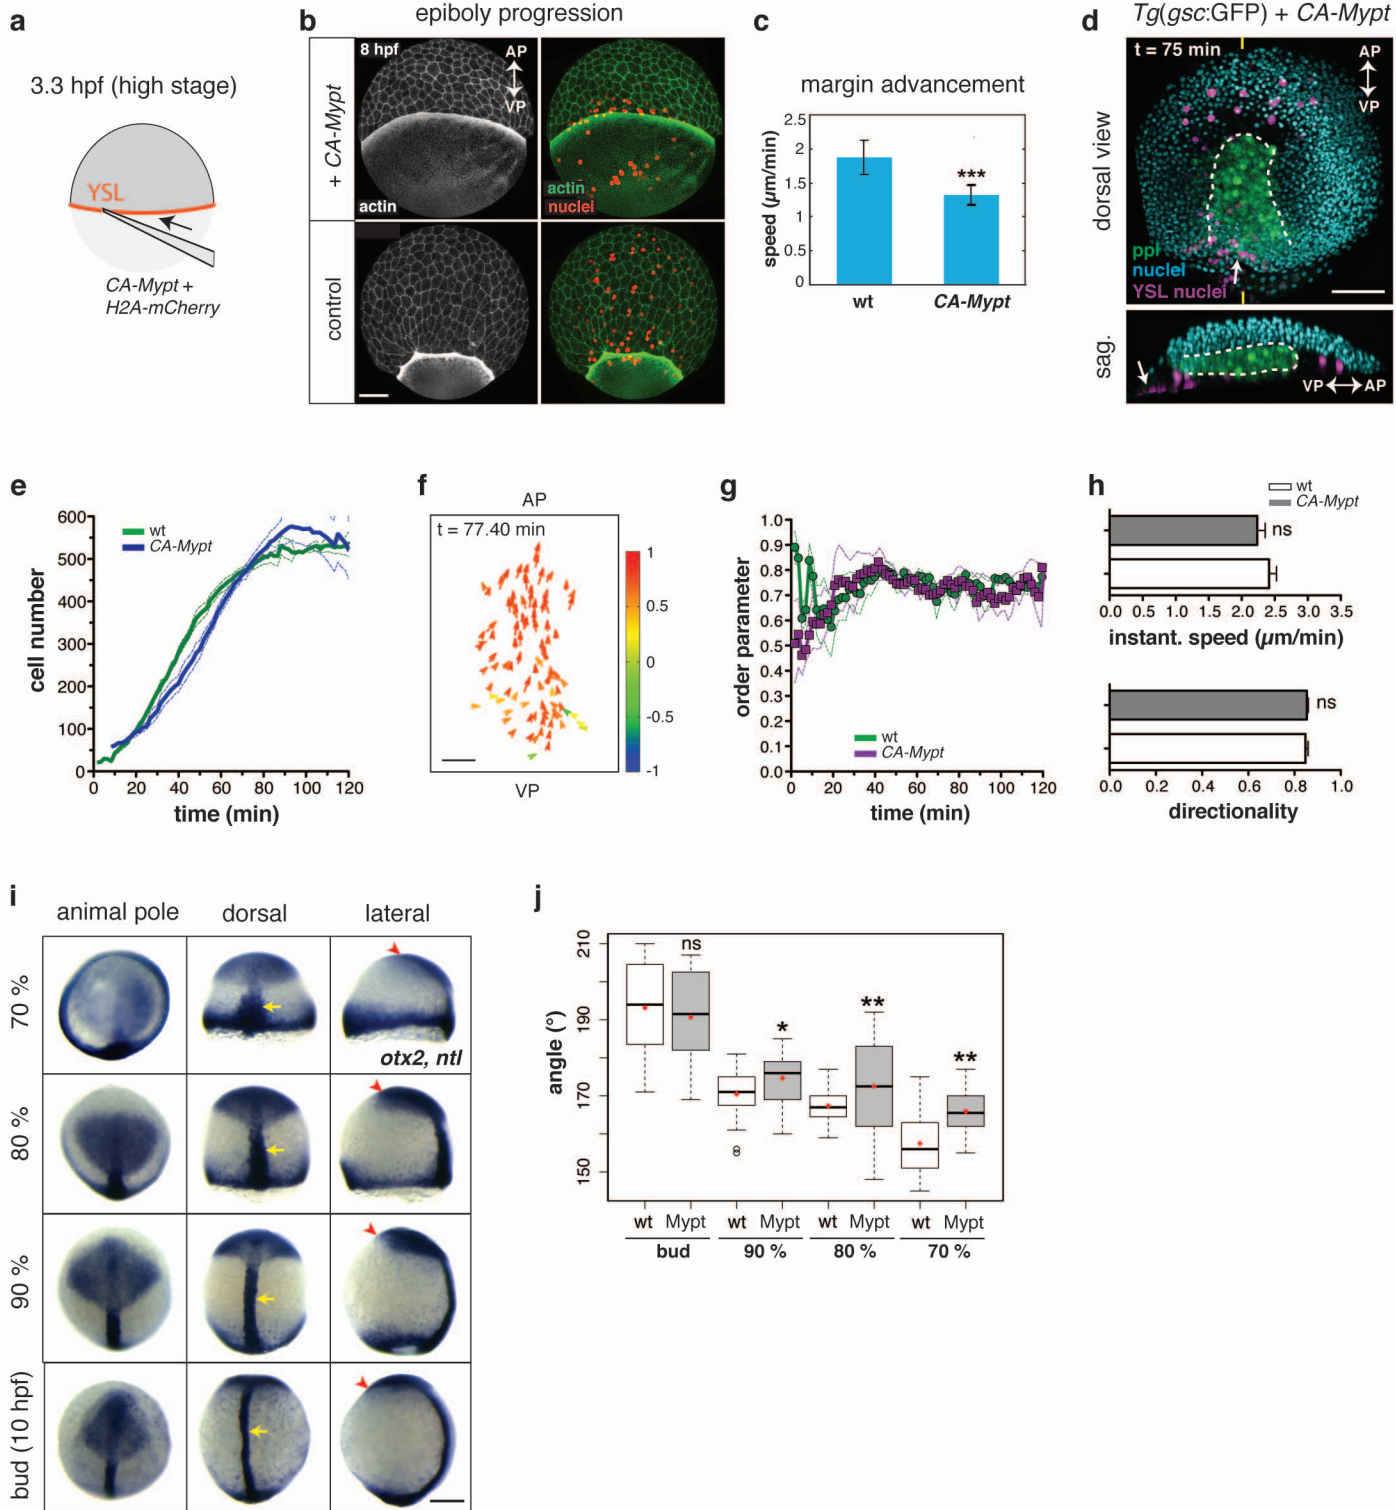

Supplement: NIHMS71588-supplement-Supplemental_Figure_4.pdf [file NIHMS71588-supplement-Supplemental_Figure_4.pdf]

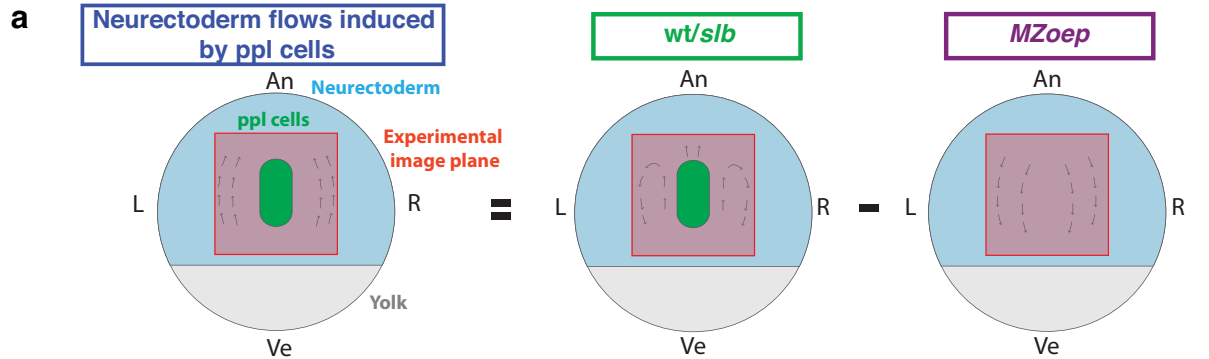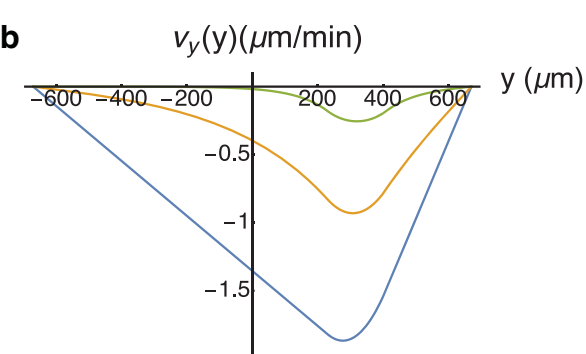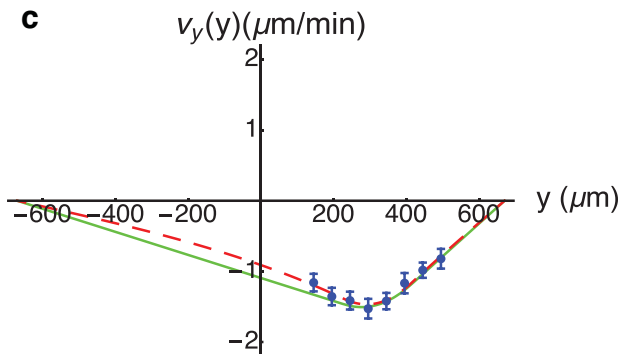

Supplement: NIHMS71588-supplement-Supplemental_Figure_6.pdf [file NIHMS71588-supplement-Supplemental_Figure_6.pdf]
